# Supplementary material
Source: Springer Nature journal article supplement (https://www.springermedizin.de/resource/supplementary/13046_2008_48_MOESM1_ESM.pdf/9661402)

M

1

2

3

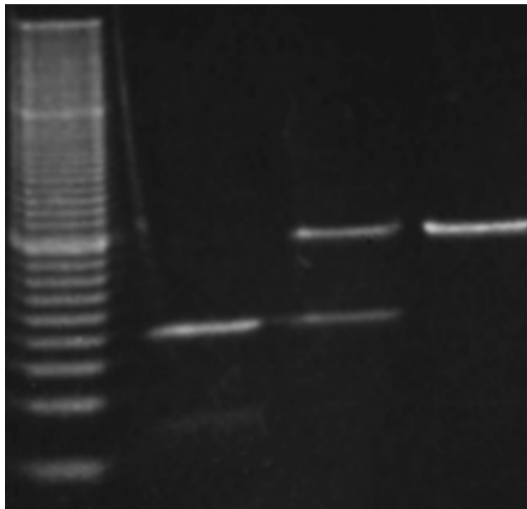

–292bp

–239bp

Supplement: MOESM1 [file 9661402]
